# Supplementary material for: A pair of 3D homochiral metal–organic frameworks: spontaneous resolution, single-crystal-to-single-crystal transformation and selective adsorption properties
Source: Royal Society of Chemistry journal article supplement (doi:10.1039/c1dt11825k), 2011-12-12
Supplement: c1dt11825k.pdf [file c1dt11825k.pdf]

Electronic Supplementary Information for

**A pair of 3D homochiral metal-organic frameworks: spontaneous resolution, single-crystal-to-single-crystal transformation and selective adsorption properties**

**Xiao-Dan Zheng, Mei Zhang, Long Jiang, and Tong-Bu Lu\***

**Table S1** Selected bond distances (Å) and angles (deg) for **1a**, **1b** and **1a'**

| <b>1a</b>             |            |                      |            |                      |           |
|-----------------------|------------|----------------------|------------|----------------------|-----------|
| Eu(1)-O(4i)           | 2.302(4)   | Eu(1)-O(1)           | 2.320(5)   | Eu(1)-O(12ii)        | 2.321(4)  |
| Eu(1)-O(8iii)         | 2.328(4)   | Eu(1)-O(6iv)         | 2.334(5)   | Eu(1)-O(10v)         | 2.343(4)  |
| Eu(1)-O(1W)           | 2.457(4)   | O(4)-Eu(1)-O(1v)     | 134.1(2)   | O(4v)-Eu(1)-O(12ii)  | 86.99(18) |
| O(1)-Eu(1)-O(12ii)    | 87.92(17)  | O(4i)-Eu(1)-O(8iii)  | 92.78(19)  | O(1)-Eu(1)-O(8iii)   | 90.59(17) |
| O(12ii)-Eu(1)-O(8iii) | 177.68(17) | O(4i)Eu(1)-O(6i)     | 149.1(2)   | O(1)-Eu(1)-O(6i)     | 76.4(2)   |
| O(12ii)-Eu(1)-O(6i)   | 89.8(2)    | O(8iii)-Eu(1)-O(6i)  | 91.61(15)  | O(1)-Eu(1)-O(10v)    | 151.0(2)  |
| O(4)-Eu(1)-O(1Wi)     | 67.9(2)    | O(6i)-Eu(1)-O(10v)   | 74.7(2)    | O(8iii)-Eu(1)-O(10v) | 87.62(16) |
| O(12ii)-Eu(1)-O(10v)  | 94.54(16)  | O(1)-Eu(1)-O(1W)     | 66.52(18)  | O(6)-Eu(1)-O(1Wi)    | 142.9(2)  |
| O(8)-Eu(1)-O(1Wiii)   | 87.91(15)  | O(10)-Eu(1)-O(1Wv)   | 142.22(19) | O(12)-Eu(1)-O(1Wii)  | 89.86(15) |
| <b>1b</b>             |            |                      |            |                      |           |
| Eu(1)-O(4i)           | 2.304(6)   | Eu(1)-O(1ii)         | 2.316(7)   | Eu(1)-O(12ii)        | 2.318(5)  |
| Eu(1)-O(6iii)         | 2.331(8)   | Eu(1)-O(8iv)         | 2.331(7)   | Eu(1)-O(10v)         | 2.346(7)  |
| Eu(1)-O(1W)           | 2.454(7)   | O(4)-Eu(1)-O(1i)     | 133.0(4)   | O(4i)-Eu(1)-O(12ii)  | 86.8(2)   |
| O(1)-Eu(1)-O(12ii)    | 88.3(2)    | O(4i)-Eu(1)-O(6iii)  | 150.3(4)   | O(1)-Eu(1)-O(6iii)   | 76.2(3)   |
| O(12ii)-Eu(1)-O(6iii) | 89.6(3)    | O(4iv)-Eu(1)-O(8i)   | 92.8(3)    | O(1)-Eu(1)-O(8iv)    | 89.9(3)   |
| O(12ii)-Eu(1)-O(8iv)  | 177.0(3)   | O(6iii)-Eu(1)-O(8iv) | 92.2(2)    | O(4i)-Eu(1)-O(10v)   | 74.6(4)   |
| O(1)-Eu(1)-O(10v)     | 152.4(3)   | O(12ii)-Eu(1)-O(10v) | 94.8(2)    | O(6iii)-Eu(1)-O(10v) | 76.4(3)   |
| O(8iv)-Eu(1)-O(10v)   | 87.9(2)    | O(4)-Eu(1)-O(1Wi)    | 67.0(3)    | O(1)-Eu(1)-O(1W)     | 66.3(3)   |
| O(6)-Eu(1)-O(1Wiii)   | 142.5(3)   | O(8)-Eu(1)-O(1Wiv)   | 87.4(2)    | O(10)-Eu(1)-O(1Wv)   | 141.0(3)  |

**1a'**

---

|                      |           |                     |           |                      |           |
|----------------------|-----------|---------------------|-----------|----------------------|-----------|
| Eu(1)-O(1i)          | 2.298(11) | Eu(1)-O(1)          | 2.298(11) | Eu(1)-O(1ii)         | 2.298(11) |
| Eu(1)-O(1iii)        | 2.298(11) | Eu(1)-O(1iv)        | 2.298(11) | Eu(1)-O(1v)          | 2.298(11) |
| O(1i)-Eu(1)-O(1)     | 167.6(8)  | O(1i)-Eu(1)-O(1ii)  | 84.8(6)   | O(1)-Eu(1)-O(1ii)    | 87.4(4)   |
| O(1i)-Eu(1)-O(1iii)  | 87.4(4)   | O(1)-Eu(1)-O(1iii)  | 84.8(6)   | O(1ii)-Eu(1)-O(1iii) | 101.8(7)  |
| O(1i)-Eu(1)-O(1iv)   | 101.8(7)  | O(1)-Eu(1)-O(1iv)   | 87.4(4)   | O(1ii)-Eu(1)-O(1iv)  | 87.4(4)   |
| O(1iii)-Eu(1)-O(1iv) | 167.6(8)  | O(1i)-Eu(1)-O(1v)   | 87.4(4)   | O(1)-Eu(1)-O(1v)     | 101.8(7)  |
| O(1ii)-Eu(1)-O(1v)   | 167.6(8)  | O(1iii)-Eu(1)-O(1v) | 87.4(4)   | O(1iv)-Eu(1)-O(1v)   | 84.8(6)   |

Symmetry transformations used to generate equivalent atoms: **1a**: (i)  $-x+1, y+1/2, -z$ ; (ii)  $x, y, z-1$ ; (iii)  $1-x, y+1/2, 1-z$ ; (iv)  $x+1, y, z$ ; (v)  $x+1, y, z-1$ ; (vi)  $1-x, y-1/2, -z$ ; (vii)  $x-1, y, z$ ; (viii)  $1-x, y-1/2, 1-z$ ; (ix)  $x-1, y, z+1$ ; (x)  $x, y, z+1$ ; **1b**: (i)  $1-x, y-1/2, 2-z$ ; (ii)  $x, y, z+1$ ; (iii)  $x-1, y, z$ ; (iv)  $1-x, y-1/2, 1-z$ ; (v)  $x-1, y, z+1$ ; (vi)  $1-x, y+1/2, 2-z$ ; (vii)  $x+1, y, z$ ; (viii)  $1-x, y+1/2, 1-z$ ; (ix)  $x+1, y, z-1$ ; (x)  $x, y, z-1$ ; **1a'**: (i)  $-y, -x, -z$ ; (ii)  $-y, x-y, z$ ; (iii)  $-x+y, y, -z$ ; (iv)  $-x+y, -x, z$ ; (v)  $x, x-y, -z$ ; (vi)  $-x+y, -x+1, z$ ; (vii)  $-y+1, x-y+1, z$ ; (viii)  $x, x-y+1, -z+1$ ; (ix)  $-x+y, y, -z+1$ ; (x)  $-y, -x, -z+1$ .

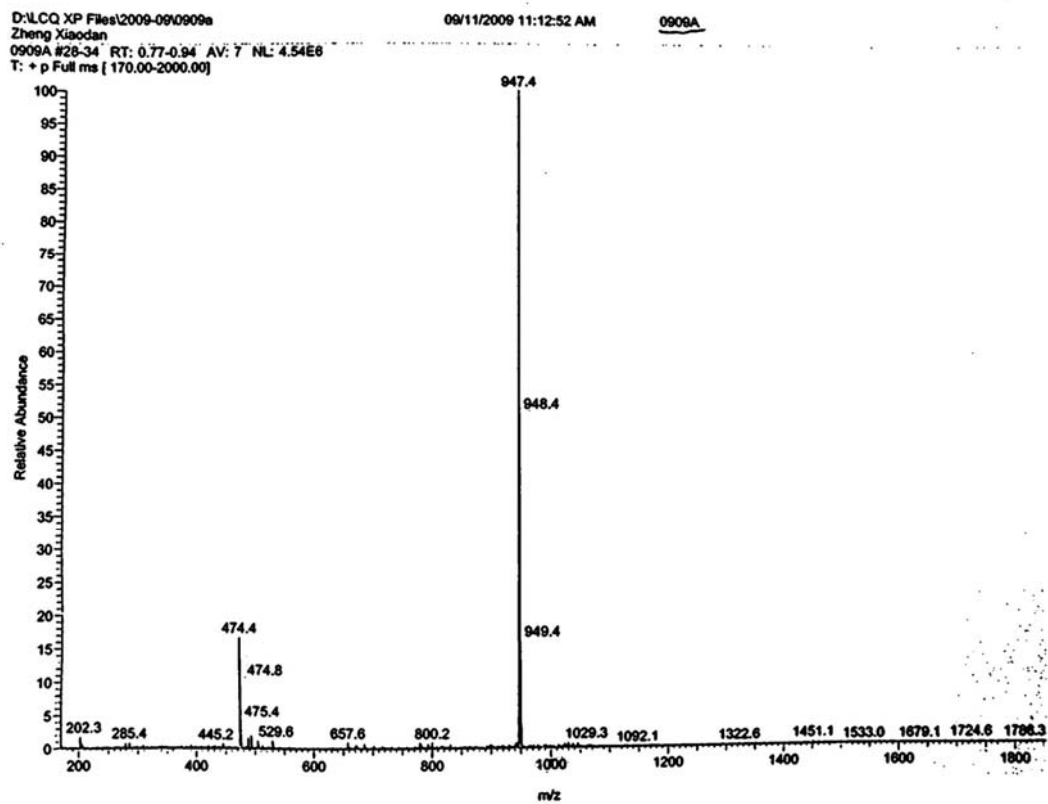

Fig. S1 ESI mass spectra of the ligand L.

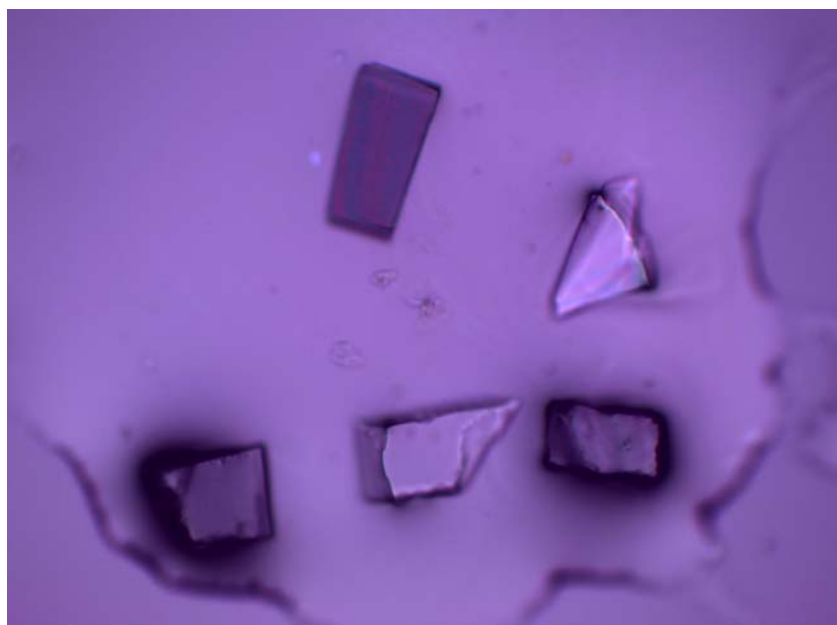

Fig. S2 View of the enantiomers of **1a** (light) and **1b** (dark) in the presence of polarized light by using a polarized light microscope.

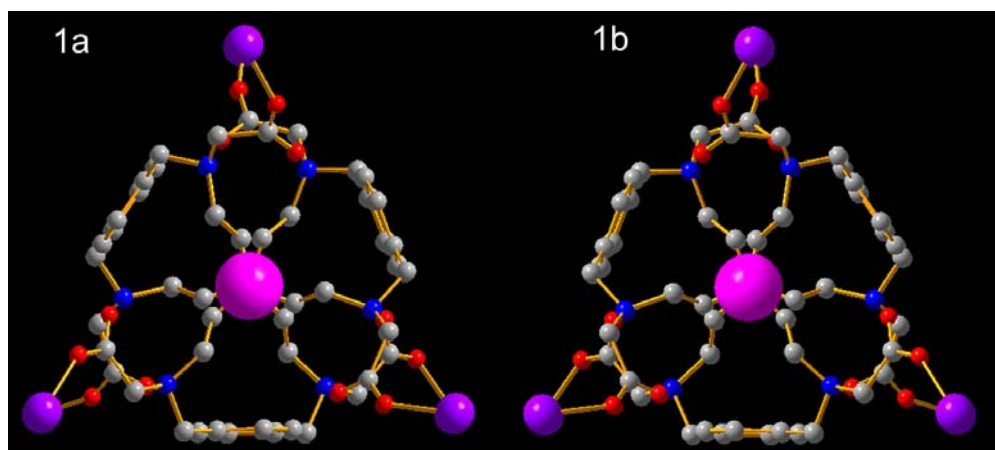

**Fig. S3**  $C_3$  symmetric conformation of the ligand in **1a** (left) and **1b** (right) viewed down the  $c$  axis (the middle pink spheres represent the  $C_3$  axis).

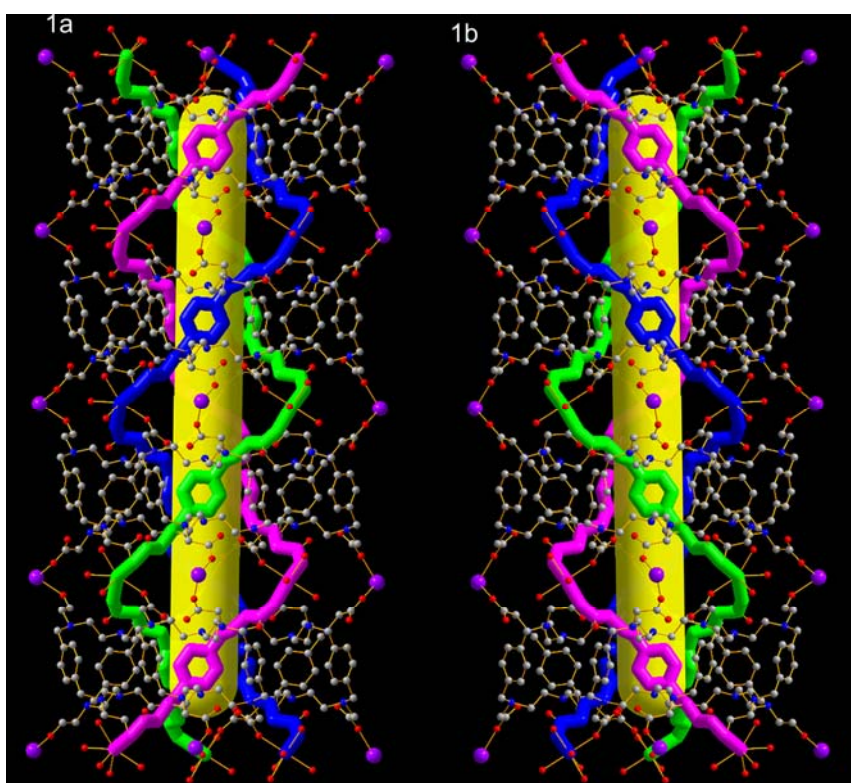

**Fig. S4** Right-handed triple-stranded helical channel in **1a** (left) and left-handed triple-stranded helical channel in **1b** (right) along the  $c$  axis (yellow pillars represent the helical channels, water molecules and H atoms are omitted for clarity).

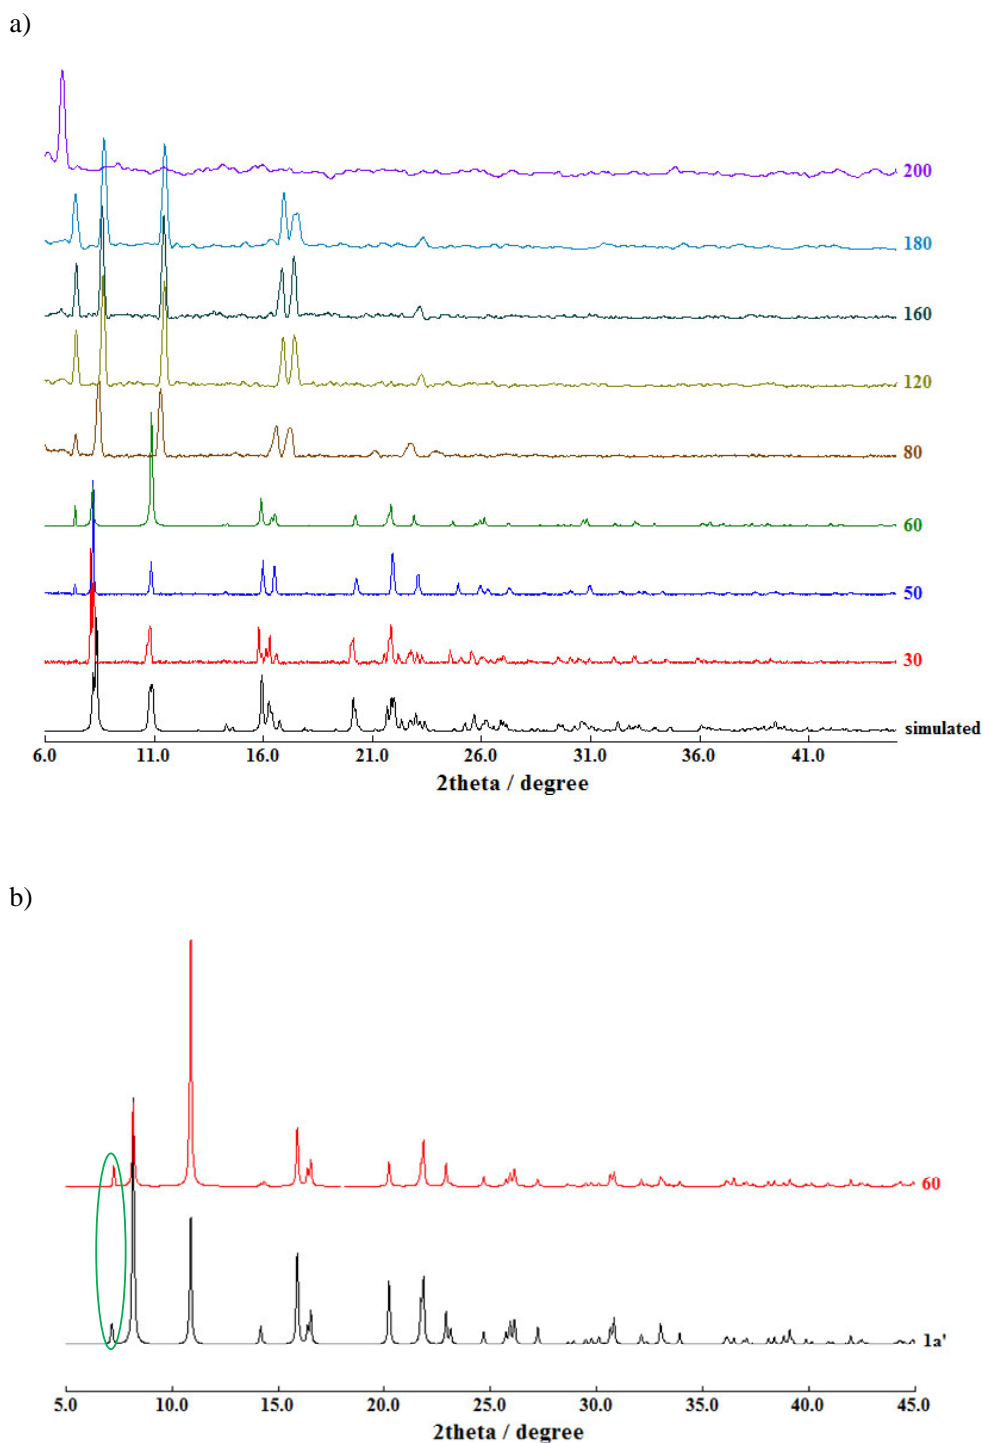

**Fig. S5** a) The XRPD patterns of **1** at different temperatures, and b) the XRD patterns of **1a'** as simulated and **1** at 60°C (the simulated patterns are generated from the single-crystal diffraction data).

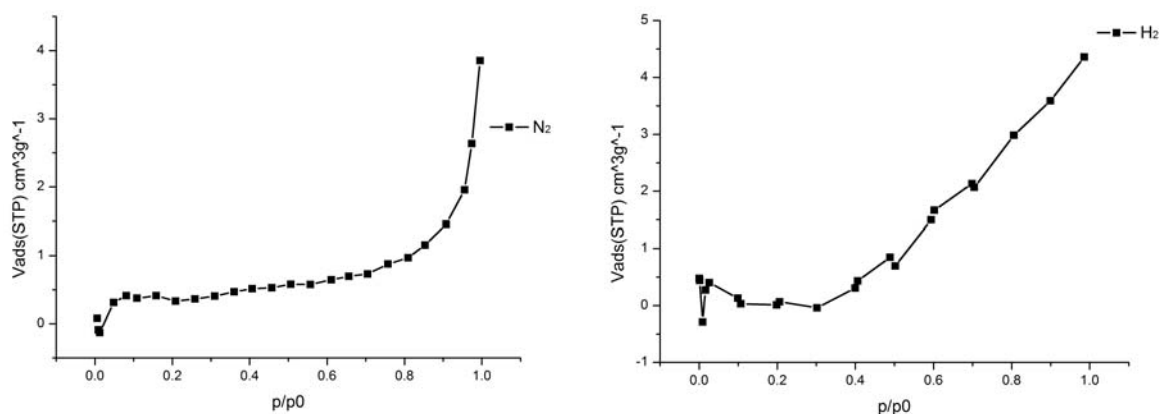

**Fig. S6** The gas sorption isotherms of nitrogen (left) and hydrogen (right) for dehydrated **1**, implying that only surface adsorption occurred.

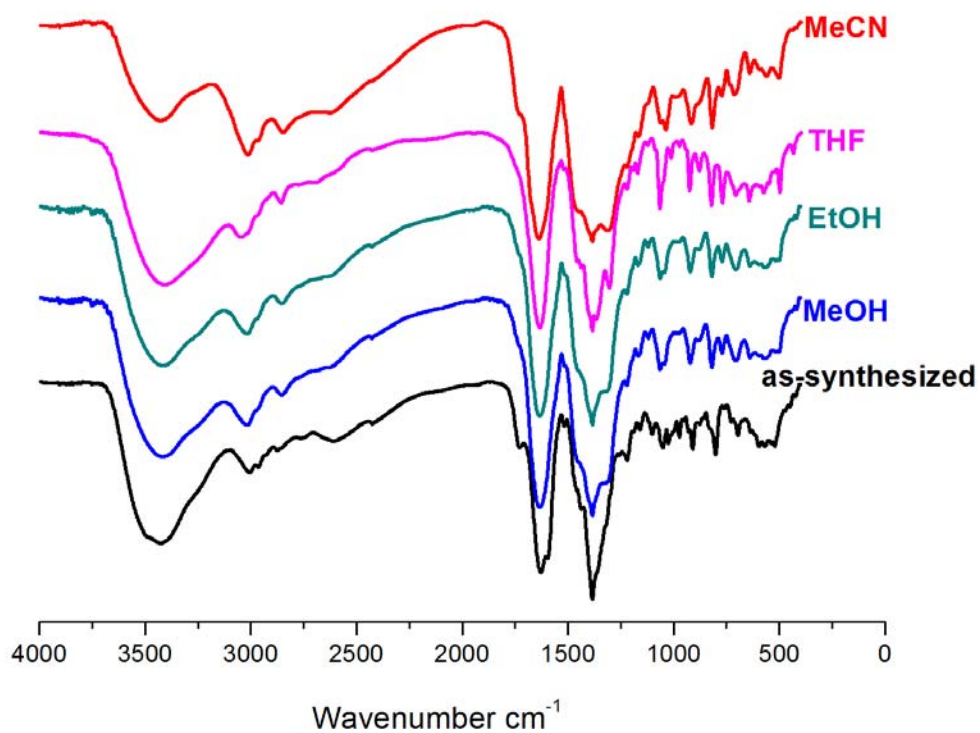

**Fig. S7** The IR spectra for the synthesized crystals, and the samples after the dehydrated crystals were immersed in different solvents for 1 day, indicating only water molecules were adsorbed by dehydrated **1**.

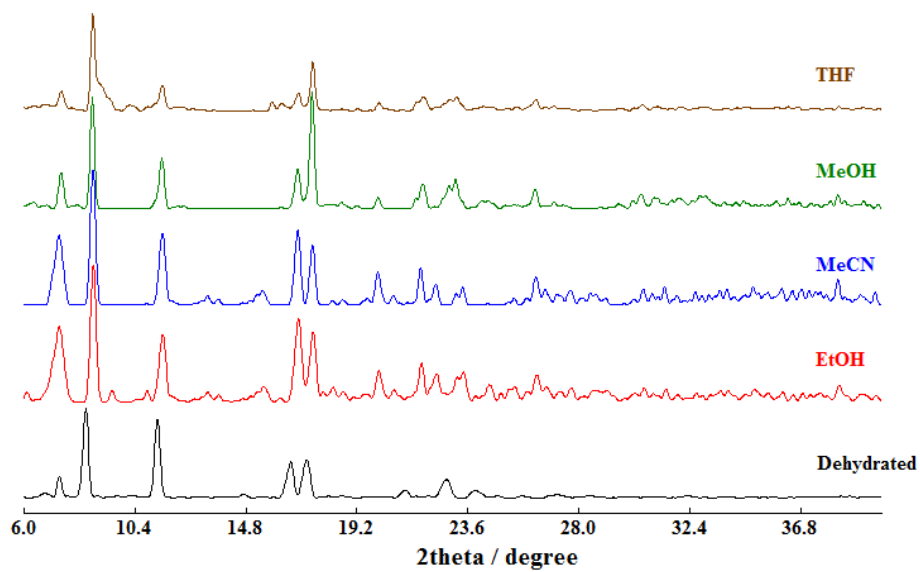

**Fig. S8** The XRPD patterns of dehydrated **1** after immersed in different dry solvents for 24 h.
